# Supplementary material for: The Polyherbal Functional Ingredient Containing Ginger, Chinese Date, and Wood Ear Mushroom Protects against Dementia following Metabolic Syndrome
Source: Hindawi journal article supplement (doi:10.1155/2023/9911397), 2023-01-01
Supplement: f1 [file 9911397.f1.pdf]

## Supplementary Data (Prefrontal Cortex)

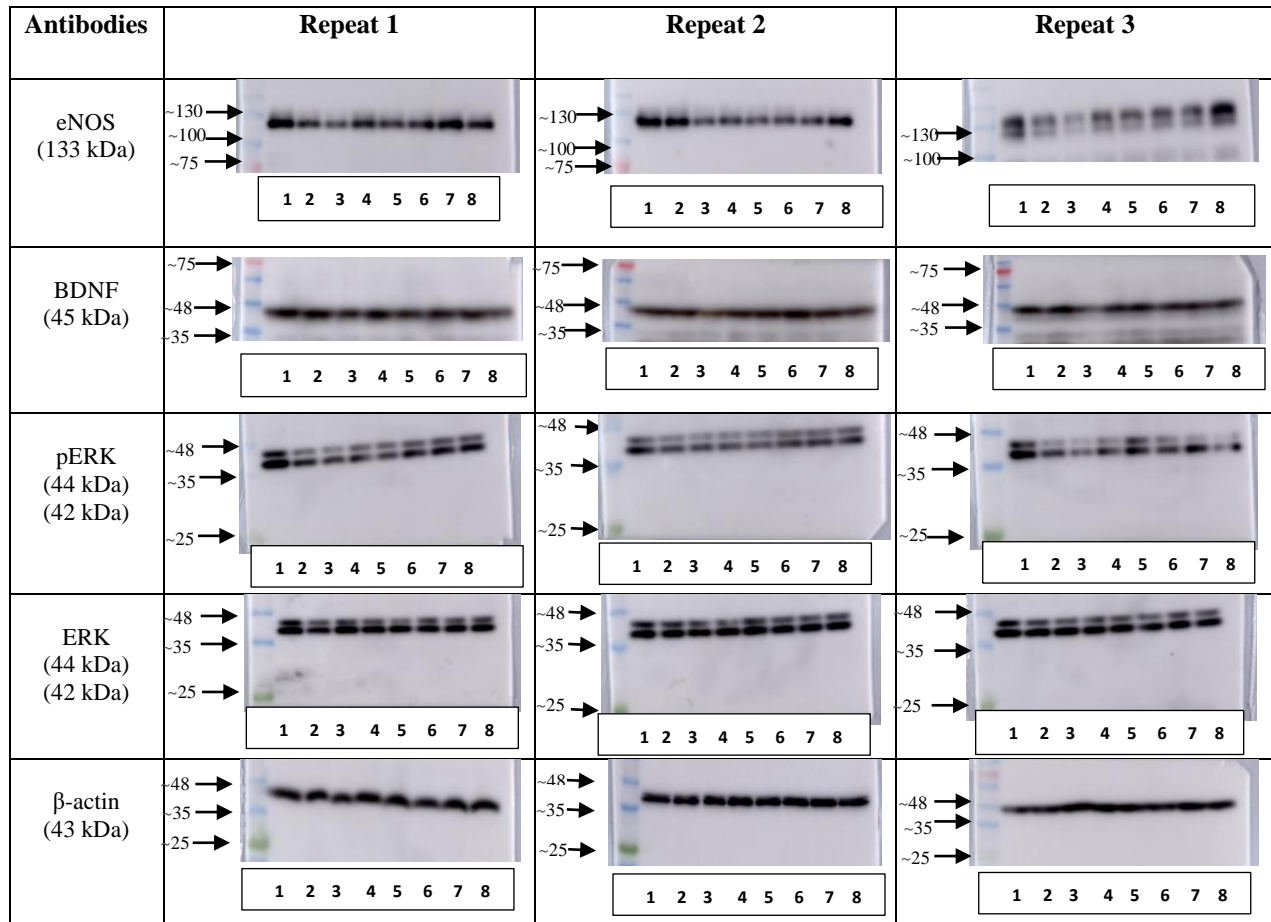

Lane1; ND+Vehicle  
 Lane2; HCHF+Sham+Vehicle  
 Lane3; HCHF+MCAO+Vehicle  
 Lane4; HCHF+MCAO+VitaminC  
 Lane5; HCHF+MCAO+Donepezil  
 Lane6; HCHF+MCAO+GCJ100  
 Lane7; HCHF+MCAO+GCJ200  
 Lane8; HCHF+MCAO+GCJ300

### Supplementary Data (Hippocampus)

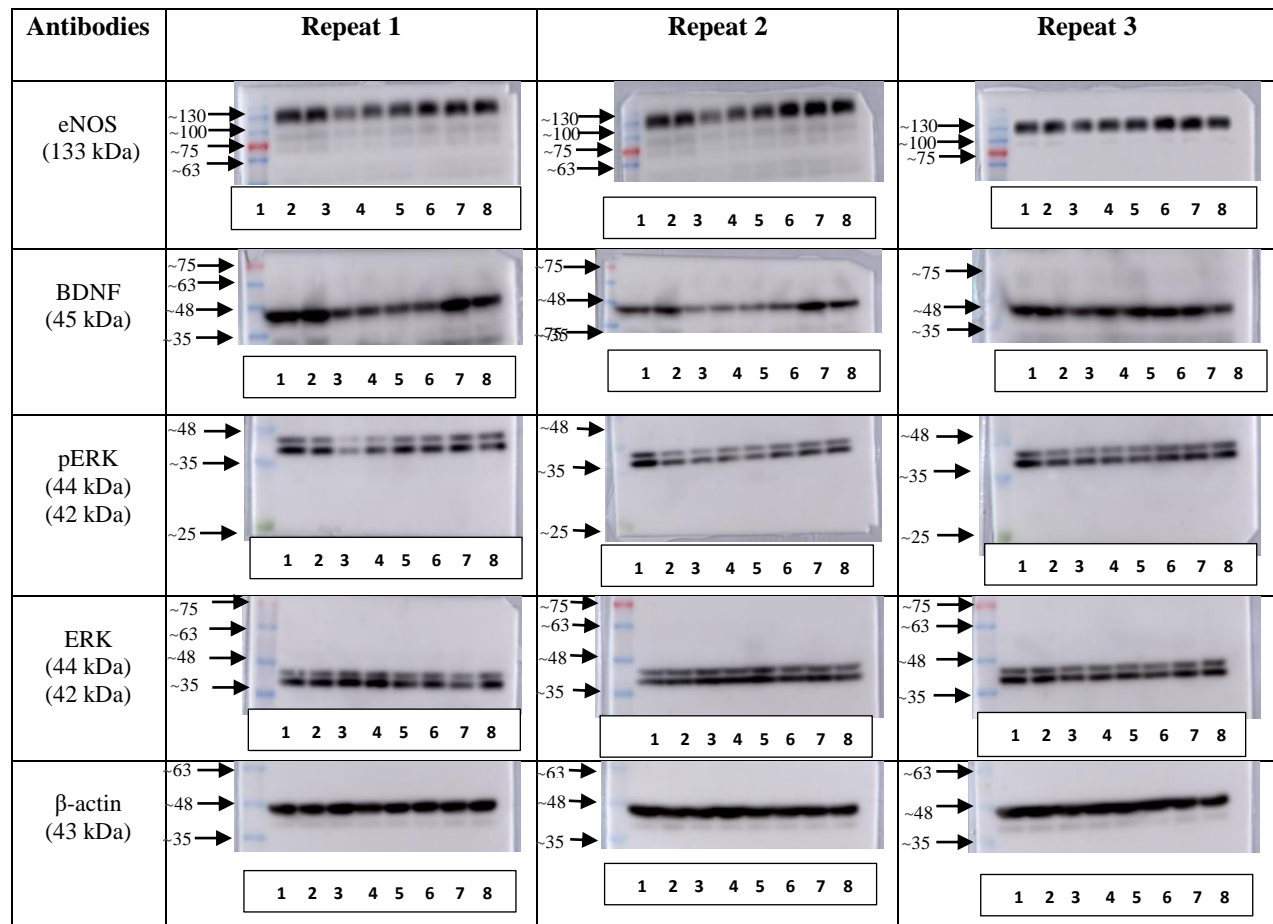

Lane1; ND+Vehicle  
 Lane2; HCHF+Sham+Vehicle  
 Lane3; HCHF+MCAO+Vehicle  
 Lane4; HCHF+MCAO+VitaminC  
 Lane5; HCHF+MCAO+Donepezil  
 Lane6; HCHF+MCAO+GCJ100  
 Lane7; HCHF+MCAO+GCJ200  
 Lane8; HCHF+MCAO+GCJ300
